# Supplementary material
Source: PubMed Central journal article supplement (PMC55497)
Supplement: pnas_171120098_1.pdf [file pnas_171120098_1.pdf]

**Table 2.  $^1\text{H}$  NMR chemical shifts**

| Residue* | NH    | CH( $\alpha$ ) | CH( $\beta$ ) | CH( $\gamma$ ) | CH( $\delta$ ) | CH( $\epsilon$ ) |
|----------|-------|----------------|---------------|----------------|----------------|------------------|
| Thr-5    | 8.10  | 4.25           | 4.06          | 1.12           |                |                  |
| Leu-6    | 7.86  | 4.68           | 1.11          | 1.54           | 0.76; 0.63     |                  |
| Val-7    | 8.74  | 4.50           | 2.05          | 0.82; 0.74     |                |                  |
| Lys-8    | 8.35  | 4.43           | 2.00; 1.82    | 1.51; 1.38     | 1.71           | †                |
| Cys-9    | 8.93  | 3.96           | 2.97; 2.92    |                |                |                  |
| Ala-10   | 8.01  | 4.07           | 0.98          |                |                |                  |
| Cys-11   | 7.95  | 4.63           | 3.69; 3.05    |                |                |                  |
| Glu-12   | 9.29  | 4.12           | 2.18; 2.27    | 2.38           |                |                  |
| Pro-13   | —     | 4.48           | 2.19; 1.65    | 1.43; 1.32     | 3.64           |                  |
| Cys-14   | 8.07  | 4.16           | 3.50; 3.32    |                |                |                  |
| Leu-15   | 8.51  | 4.42           | 1.76          | 1.98           | 0.99; 0.89     |                  |
| Cys-16   | 8.16  | 3.81           | 2.86; 2.79    |                |                |                  |
| Asn-17   | 8.49  | 5.32           | 2.55; 2.26    |                | 7.22; 6.68     |                  |
| Val-18   | 9.64  | 4.52           | 1.84          | 0.54; 0.42     |                |                  |
| Asp-19   | 8.50  | 4.93           | 2.73; 2.40    |                |                |                  |
| Pro-20   | —     | 3.98/3.76‡     | 1.84          | 1.40; 1.10     | 3.24           |                  |
| Ser-21   | 8.26  | 4.23           | 3.89; 3.83    |                |                |                  |
| Lys-22   | 7.81  | 4.59           | 1.98; 1.60    | 1.35; 1.28     | 1.68           | 2.97             |
| Ala-23   | 7.44  | 4.56           | 1.35          |                |                |                  |
| Ile-24   | 7.72  | 4.03           | 1.66          | 1.15; 0.78     | 0.69           |                  |
| Asp-25   | 8.46  | 5.27           | 2.74; 2.48    |                |                |                  |
| Arg-26   | 8.94  | 4.57           | 1.79          | 1.56; 1.49     | 3.22; 3.04     |                  |
| Asn-27   | 9.22  | 4.32           | 3.07; 2.80    |                | 7.58; 6.87     |                  |
| Gly-28   | 8.91  | 3.95; 3.41     |               |                |                |                  |
| Leu-29   | 7.29  | 4.18           | 1.76          | 1.49           | 0.91; 0.84     |                  |
| Tyr-30   | 7.45  | 5.37           | 2.45          |                | 6.87           | 6.74             |
| Tyr-31   | 9.20  | 5.84           | 2.97; 2.59    |                | 6.79; 6.89§    | 6.49             |
| Cys-32   | 10.09 | 4.68           | 3.57; 2.72    |                |                |                  |
| Ser-33   | 8.42  | 4.80           | 4.39; 4.18    |                |                |                  |
| Glu-34   | 9.41  | 3.78           | 1.97; 1.90    | 2.26           |                |                  |
| Ala-35   | 8.13  | 3.87           | 1.14          |                |                |                  |
| Cys-36   | 7.24  | 3.71           | 3.36; 2.89    |                |                |                  |
| Ala-37   | 7.52  | 1.73           | 0.84          |                |                |                  |
| Asp-38   | 7.83  | 4.46           | 2.63          |                |                |                  |
| Gly-39   | 7.43  | 4.03; 3.94     |               |                |                |                  |
| His-40   | 8.59  | 3.82           | 3.48; 3.11    |                | 6.69           | 7.78             |
| Thr-41   | 7.39  | 4.15           | 4.08          | 1.25           |                |                  |
| Gly-42   | ¶     |                |               |                |                |                  |
| Gly-43   | 8.38  | 4.11; 3.97     |               |                |                |                  |
| Ser-44   | 7.20  | 4.33           | 4.01; 3.88    |                |                |                  |
| Lys-45   | 8.41  | 4.77           | 1.74; 1.68    | 1.44; 1.30     | 1.62           | 2.92             |
| Gly-46   | 9.02  | 4.54; 3.87     |               |                |                |                  |

|        |      |            |            |  |      |      |
|--------|------|------------|------------|--|------|------|
| Cys-47 | 8.61 | 4.91       | 3.55; 2.83 |  |      |      |
| Gly-48 | 8.36 | 3.82; 3.63 |            |  |      |      |
| His-49 | 6.91 | 5.17       | 3.21; 2.80 |  | 7.27 | 8.10 |
| Thr-50 | †    |            |            |  |      |      |
| Gly-51 | †    |            |            |  |      |      |
| Cys-52 | 7.54 | 4.60       | 3.28; 2.83 |  |      |      |
| Asn-53 | 8.62 | 5.17       | 2.92; 2.60 |  | 7.50 | 6.77 |
| Cys-54 | 8.14 | 3.98       | 3.12; 2.87 |  |      |      |
| His-55 | 6.02 | 3.79       | 3.20; 3.10 |  | 7.28 | 8.31 |
| Gly-56 | 8.54 | 4.22; 3.69 |            |  |      |      |

\* The numbering refers to the full-length protein; residue M1 was not present in the recombinant protein; NH resonances for residues T2–T4 were not observable; crosspeaks for remaining protons of these residues were unassignable because of overlap and absence of interresidue NOEs.

† Unassigned due to crosspeak overlap.

‡ Two shifts were observed for CH( $\alpha$ ), possibly due to cis/trans-isomerism. The major peak at 3.76 ppm was used in the structure determination, but use of the minor peak led to only minor local changes in the structure.

§ Two resonances for the  $\delta$  protons are observed due to hindered rotation [CH/ $\pi$  interaction with CH( $\alpha$ ) of Ala-37].

¶ Unassigned; no NH resonance observed, no interresidue NOEs detected.
