# Supplementary material
Source: PubMed Central journal article supplement (PMC55497)
Supplement: pnas_171120098_6.pdf [file pnas_171120098_6.pdf]

|                           |                                       |                   |                   |                      |            |
|---------------------------|---------------------------------------|-------------------|-------------------|----------------------|------------|
| SatA NMR structure        | .....EE...LL...EE.L...EEE-----TT----- | EEE..HHHHH        | .....             |                      |            |
| Site A Ligands            | 9 14                                  | 32 36             |                   |                      |            |
| <i>S. POC 7942</i>        | MTSTTLVRCACEPCLCNVDPKAIQR             | -----NG           | -----LYKQSEACADG  | HTGGSKGQGHG          | ---CNCHG   |
| <i>S. vulcerus</i>        | MTTVTQMPACPHLCIVSLNDAINV              | -----DG           | -----KPKUSEVCAAGT | C-KENSQGGHAG         | ---GGGSA   |
| <i>S. WH8120</i>          | MSTAIRACPRPTCMVAEESAIVL               | -----QG           | -----KPFQSTSCSTG  | H-ANNEPCHGEGSCGCKQGE |            |
| <i>Anabaena POC 7120</i>  | MTTVQMPACPSLCLISVEDAINK               | -----EG           | -----KYKUSEGCABG  | H-KTIKQGNHNG         | ---GGC     |
| <i>N. magnetotacticum</i> | MASVDVENVRCAPDQVCVVSLSKAVKR           | -----DD           | -----KSPQDDECAEG  | H-PDHAGCDHAG         | ---CTCHG   |
| <i>P. aeruginosa</i>      | MNSETACPRPTCQPG-ADAVR                 | -----DG           | -----QHVOCAACAGG  | H-PQGEPCRDAD         | ---CPC     |
| <i>P. putida KT2440</i>   | MNDQRCACTHOSCTVD-ANALQR               | -----DG           | -----KANOCEACASG  | HRRKGEPCRMQD         | ---CHC     |
| <i>P. fluorescens</i>     | MADRRDCPGRCRTIKEGEHSYV                | -----AHG          | -----KHVOCEACAHH  | H-KSGEECSGAG         | ---CQCAHPE |
| <i>E. coli (ydaE)</i>     | MTKKIRLAYHLCKKDVEESKAIE               | RMLHFMRGILSKDEBRK | KYKUSEACAER       | DOMAHEL              |            |
| <i>L. pneumophila</i>     | MTKKIRLAYHLCKKDVEESKAIE               | RMLHFMRGILSKDEBRK | KYKUSEACAER       | DOMAHEL              |            |
| <i>S. typhi</i>           | MTKKIRLAYHLCKKIEESKIITR               | RPLHFMRGVIPTTEMKK | KYKSEICAEK        | DOMAHEL              |            |
| <i>S. typhimurium</i>     | MLK--QGGY--GRKSIDCKEVKNTLL            | YINGSQLARKEKENC   | SROCAEY           | DOMAHE8              |            |
| <i>K. pneumophila</i>     | -----KGGY--GRKAIE-GKPVVSTLL           | YLOGNQLARKEKENC   | SERCASY           | DOMAHE               |            |
